# Supplementary material
Source: publisher figshare collection journal article supplement (https://frontiersin.figshare.com/ndownloader/files/29146101)
Supplement: Supplementary file [file 29146101]

**Physiology of the nitrite-oxidizing bacterium *Candidatus Nitrotoga* sp. CP45 enriched from a Colorado river**

Munira A. Lantz, Andrew M. Boddicker, Michael P. Kain, Owen M. C. Berg, Courtney D. Wham, Annika C. Mosier

**Supplemental Material**

**Supplemental Table S1.** Mean nitrite oxidation rates ( $\mu\text{M day}^{-1}$ ) at varying treatment conditions, with accompanying standard deviation values of replicate cultures. Data should be compared within an experiment, but not necessarily between experiments (see Methods).

| <b>Treatment</b>   | <b>Condition</b> | <b>Mean nitrite oxidation rate (<math>\mu\text{M day}^{-1}</math>)</b> | <b>Standard Deviation</b> |
|--------------------|------------------|------------------------------------------------------------------------|---------------------------|
| <b>Light/ Dark</b> | Light            | 3                                                                      | 1                         |
|                    | Dark             | 194                                                                    | 5                         |
| <b>pH</b>          | pH 5.0           | 41                                                                     | 11                        |
|                    | pH 5.7           | 102                                                                    | 10                        |
|                    | pH 6.0           | 144                                                                    | 9                         |
|                    | pH 7.0           | 162                                                                    | 5                         |
|                    | pH 8.0           | 162                                                                    | 2                         |
| <b>Temperature</b> | 4°C              | 44                                                                     | 0                         |
|                    | 10°C             | 90                                                                     | 3                         |
|                    | 15°C             | 153                                                                    | 5                         |
|                    | 20°C             | 185                                                                    | 11                        |
|                    | 23°C             | 225                                                                    | 26                        |
|                    | 25°C             | 256                                                                    | 3                         |
|                    | 28°C             | 196                                                                    | 9                         |
|                    | 30°C             | 0                                                                      | 1                         |

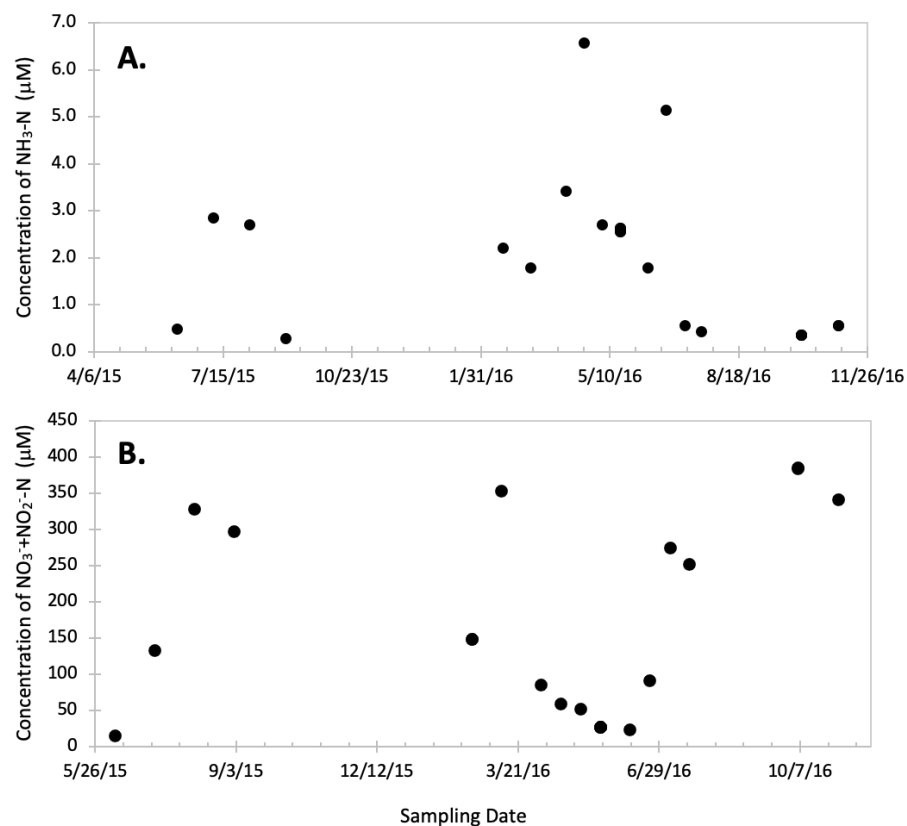

**Supplemental Figure S1.** The concentration of (A) ammonia as nitrogen ( $\mu\text{M NH}_3\text{-N}$ ) and (B) nitrate and nitrite as nitrogen ( $\mu\text{M NO}_3^- + \text{NO}_2^- \text{-N}$ ) in the experimental dataset obtained by the Northern Water Conservation District at the nearby site approximately 2 miles away on the same river.

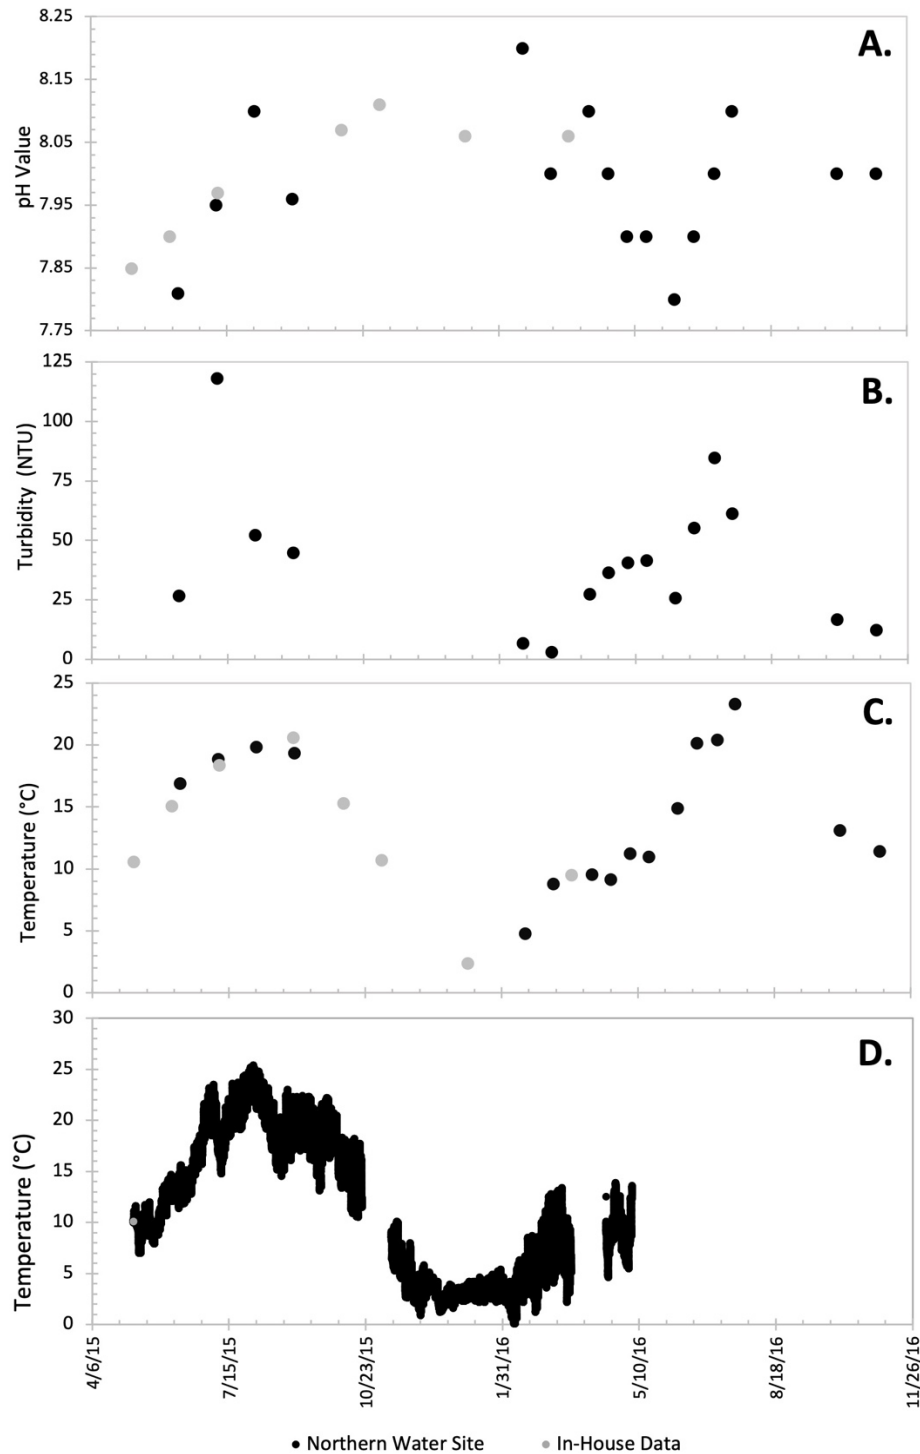

**Supplemental Figure S2.** Water column data measured at the CP45 site (grey symbols) or obtained by the Northern Water Conservation District at the nearby site approximately 2 miles away (black symbols) for (A) pH, (B) turbidity, and (C) temperature. (D) Water temperature at 15-minute intervals around the clock for the 12-month time period from a Northern Water Conservation District sampling site approximately 9 miles away from the experimental sampling site.
